# Supplementary material for: Identifying individual, household and environmental risk factors for malaria infection on Bioko Island to inform interventions
Source: Malar J. 2023 Mar 1;22:72. doi: 10.1186/s12936-023-04504-7 (PMC9979414; doi:10.1186/s12936-023-04504-7)
Supplement: Supplementary file 1 — Additional file 1: Table S1. Odds ratios estimated from regression models of all risk factors for malaria transmission on Bioko Island and 95% confidence intervals, stratified by rural and urban settings and malaria annual indicator survey year, 2015 and 2018. [file 12936_2023_4504_MOESM1_ESM.xlsx]

## Sheet: SupplementaryTable1
	Table S1. Odds ratios estimated from regression models of all risk factors for malaria transmission on Bioko Island and 95% confidence intervals, stratified by rural and urban settings and malaria annual indicator survey year, 2015 and 2018.
		2015												2018
		Rural						Urban						Rural						Urban
	Variable	OR	SE	t	p	lower	upper	OR	SE	t	p	lower	upper	OR	SE	t	p	lower	upper	OR	SE	t	p	lower	upper
	Sex
	Male (reference)	1						1						1						1
	Female	0.852024	0.0926514	-1.47	0.146	0.685701	1.05869	0.838122	0.0478251	-3.09	0.002	0.748918	0.937952	0.850693	0.125373	-1.1	0.276	0.634486	1.14057	0.856693	0.0524512	-2.53	0.012	0.759326	0.966545
	Age Group
	<5 years old (reference)	1						1						1						1
	5-9 years old	3.10156	0.741495	4.73	0	1.92408	4.99963	2.52183	0.213398	10.93	0	2.13422	2.97984	3.59248	0.893734	5.14	0	2.18988	5.89341	1.71465	0.217796	4.25	0	1.33497	2.20232
	10-14 years old	2.89802	0.685189	4.5	0	1.8073	4.64698	3.31564	0.348381	11.41	0	2.6951	4.07907	3.63201	0.862132	5.43	0	2.26482	5.82453	2.48486	0.341839	6.62	0	1.89483	3.25862
	15-19 years old	2.1223	0.621411	2.57	0.012	1.18263	3.80861	2.52202	0.254009	9.18	0	2.06769	3.07618	3.19565	1.08362	3.43	0.001	1.62759	6.27441	2.05931	0.269004	5.53	0	1.59195	2.66388
	20-29 years old	1.30641	0.328222	1.06	0.291	0.790981	2.1577	1.26955	0.115455	2.62	0.009	1.06111	1.51894	1.01801	0.396149	0.05	0.964	0.469348	2.20807	1.13512	0.146882	0.98	0.328	0.879634	1.46481
	30-39 years old	1.01226	0.289841	0.04	0.966	0.57141	1.79325	0.910157	0.120871	-0.71	0.479	0.700443	1.18266	1.74474	0.50485	1.92	0.058	0.981061	3.10289	0.932405	0.151635	-0.43	0.667	0.676748	1.28464
	40-49 years old	0.772566	0.222074	-0.9	0.373	0.435128	1.37169	1.03418	0.147033	0.24	0.813	0.781315	1.36888	1.54423	0.640829	1.05	0.298	0.676273	3.52617	0.970392	0.177017	-0.16	0.869	0.677381	1.39015
	50-59 years old	0.595152	0.257699	-1.2	0.235	0.250651	1.41314	1.13928	0.219264	0.68	0.499	0.779451	1.66521	1.13952	0.583456	0.26	0.799	0.411413	3.15619	0.699793	0.170029	-1.47	0.143	0.433545	1.12955
	>60 years old	0.784522	0.269367	-0.71	0.482	0.395184	1.55744	0.666526	0.173612	-1.56	0.121	0.398772	1.11406	0.333992	0.138678	-2.64	0.01	0.146199	0.763003	0.489636	0.0999105	-3.5	0.001	0.327526	0.731982
	LLIN use	0.670971	0.111075	-2.41	0.019	0.482081	0.933872	0.658283	0.044683	-6.16	0	0.575805	0.752575	0.699053	0.12967	-1.93	0.057	0.483307	1.01111	0.702805	0.0607017	-4.08	0	0.592814	0.833204
	travel to mainland, EG	3.69033	0.841068	5.73	0	2.34093	5.81759	3.54414	0.348821	12.86	0	2.91886	4.30337	3.28133	0.968293	4.03	0	1.82414	5.90258	4.77877	0.620709	12.04	0	3.69962	6.17271
	Open Eaves	1.07213	0.157774	0.47	0.638	0.799113	1.43842	1.21295	0.102335	2.29	0.023	1.02703	1.43253	0.941288	0.180063	-0.32	0.753	0.643313	1.37728	1.17811	0.123779	1.56	0.12	0.957788	1.44911
	Air conditioning	0.436849	0.19734	-1.83	0.071	0.177224	1.07682	0.733978	0.084841	-2.68	0.008	0.58436	0.921903	0.776943	0.162269	-1.21	0.23	0.512761	1.17724	0.846479	0.0936271	-1.51	0.133	0.680703	1.05263
	Distance to military camps (km)	0.953586	0.0257723	-1.76	0.083	0.90348	1.00647	0.98773	0.0554033	-0.22	0.826	0.884293	1.10326	0.881532	0.0237526	-4.68	0	0.835516	0.930082	0.939825	0.0494301	-1.18	0.239	0.847297	1.04246
	Distance to water streams (km)	1.12732	0.107734	1.25	0.214	0.931449	1.36438	0.885266	0.341139	-0.32	0.752	0.414022	1.89288	1.01709	0.29582	0.06	0.954	0.57021	1.8142	0.843985	0.329708	-0.43	0.665	0.390849	1.82247
	SES Quintile
	1st (reference)	1						1						1						1
	2nd	0.845452	0.141582	-1	0.32	0.605118	1.18124	0.967766	0.0970365	-0.33	0.744	0.79413	1.17937	1.02462	0.207592	0.12	0.905	0.68469	1.53333	0.850695	0.102945	-1.34	0.183	0.670208	1.07979
	3rd	0.967422	0.263041	-0.12	0.903	0.562064	1.66512	0.902147	0.108128	-0.86	0.391	0.712232	1.1427	0.539749	0.136383	-2.44	0.017	0.326475	0.892348	0.8256	0.0964844	-1.64	0.102	0.655776	1.0394
	4th	0.768015	0.328463	-0.62	0.539	0.326908	1.80432	0.638401	0.0819966	-3.49	0.001	0.495547	0.822435	0.436191	0.142066	-2.55	0.013	0.228159	0.833902	0.658977	0.0963937	-2.85	0.005	0.493953	0.879135
	Household density
	Very low density (reference)	1						1						1						1
	Low density	0.920905	0.183135	-0.41	0.68	0.619058	1.36993	1.18049	0.146664	1.34	0.183	0.923961	1.50825	0.88247	0.274536	-0.4	0.689	0.475199	1.63879	0.887428	0.118042	-0.9	0.37	0.682806	1.15337
	Medium density	0.933735	0.213022	-0.3	0.765	0.592035	1.47265	1.51881	0.16548	3.84	0	1.22514	1.88287	1.14143	0.310455	0.49	0.628	0.664387	1.961	1.06885	0.135594	0.52	0.6	0.832437	1.37241
	High density	1.48206	0.446933	1.3	0.197	0.811538	2.7066	1.51155	0.209028	2.99	0.003	1.15075	1.98548	1.43138	0.493466	1.04	0.301	0.720863	2.8422	1.04164	0.166976	0.25	0.799	0.75951	1.42858
	Very high density	1.93387	0.45662	2.79	0.007	1.20679	3.09901	1.26741	0.26317	1.14	0.255	0.841532	1.90881	1.58772	0.532628	1.38	0.172	0.814507	3.09496	1.50001	0.229075	2.66	0.008	1.1102	2.0267
	TCB	1.0411	0.102095	0.41	0.683	0.855932	1.26634	1.06732	0.0614044	1.13	0.259	0.952835	1.19555	0.959215	0.121219	-0.33	0.743	0.74596	1.23344	1.06669	0.146398	0.47	0.639	0.813918	1.39795
	TCW	1.22731	0.242373	1.04	0.303	0.827311	1.82071	1.04993	0.0729983	0.7	0.484	0.915396	1.20423	0.787661	0.119289	-1.58	0.119	0.582737	1.06465	1.08077	0.138136	0.61	0.544	0.840138	1.39032
	Elevation (100m)	0.783748	0.0543648	-3.51	0.001	0.682359	0.900203	0.480461	0.0768901	-4.58	0	0.350421	0.658757	0.78573	0.033093	-5.73	0	0.722568	0.854412	0.550929	0.0873152	-3.76	0	0.403145	0.752887
	Temperature (C)	1.00609	0.0293257	0.21	0.836	0.949198	1.0664	1.03423	0.0192326	1.81	0.072	0.996985	1.07286	0.908964	0.0461255	-1.88	0.064	0.82167	1.00553	1.04544	0.0301245	1.54	0.124	0.98773	1.10652
	EVI	0.94407	0.125853	-0.43	0.667	0.7234	1.23205	1.30426	0.0917116	3.78	0	1.13537	1.49827	1.26042	0.262169	1.11	0.269	0.833261	1.90656	1.32746	0.212558	1.77	0.078	0.968244	1.81993
	Slope	0.997307	0.0130373	-0.21	0.837	0.971607	1.02369	0.990391	0.0097961	-0.98	0.33	0.971259	1.0099	1.01939	0.0157241	1.25	0.217	0.988583	1.05116	0.99608	0.0120467	-0.32	0.746	0.972622	1.0201
